# Supplementary material for: Does the coupling of the semiannual oscillation with the quasi-biennial oscillation provide predictability of Antarctic sudden stratospheric warmings?
Source: Copernicus journal article supplement (doi:10.5194/acp-21-12835-2021), 2021-08-31

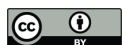

*Supplement of*

## **Does the coupling of the semiannual oscillation with the quasi-biennial oscillation provide predictability of Antarctic sudden stratospheric warmings?**

**Viktorija J. Nordström and Annika Seppälä**

*Correspondence to:* Annika Seppälä ([annika.seppala@otago.ac.nz](mailto:annika.seppala@otago.ac.nz))

The copyright of individual parts of the supplement might differ from the article licence.

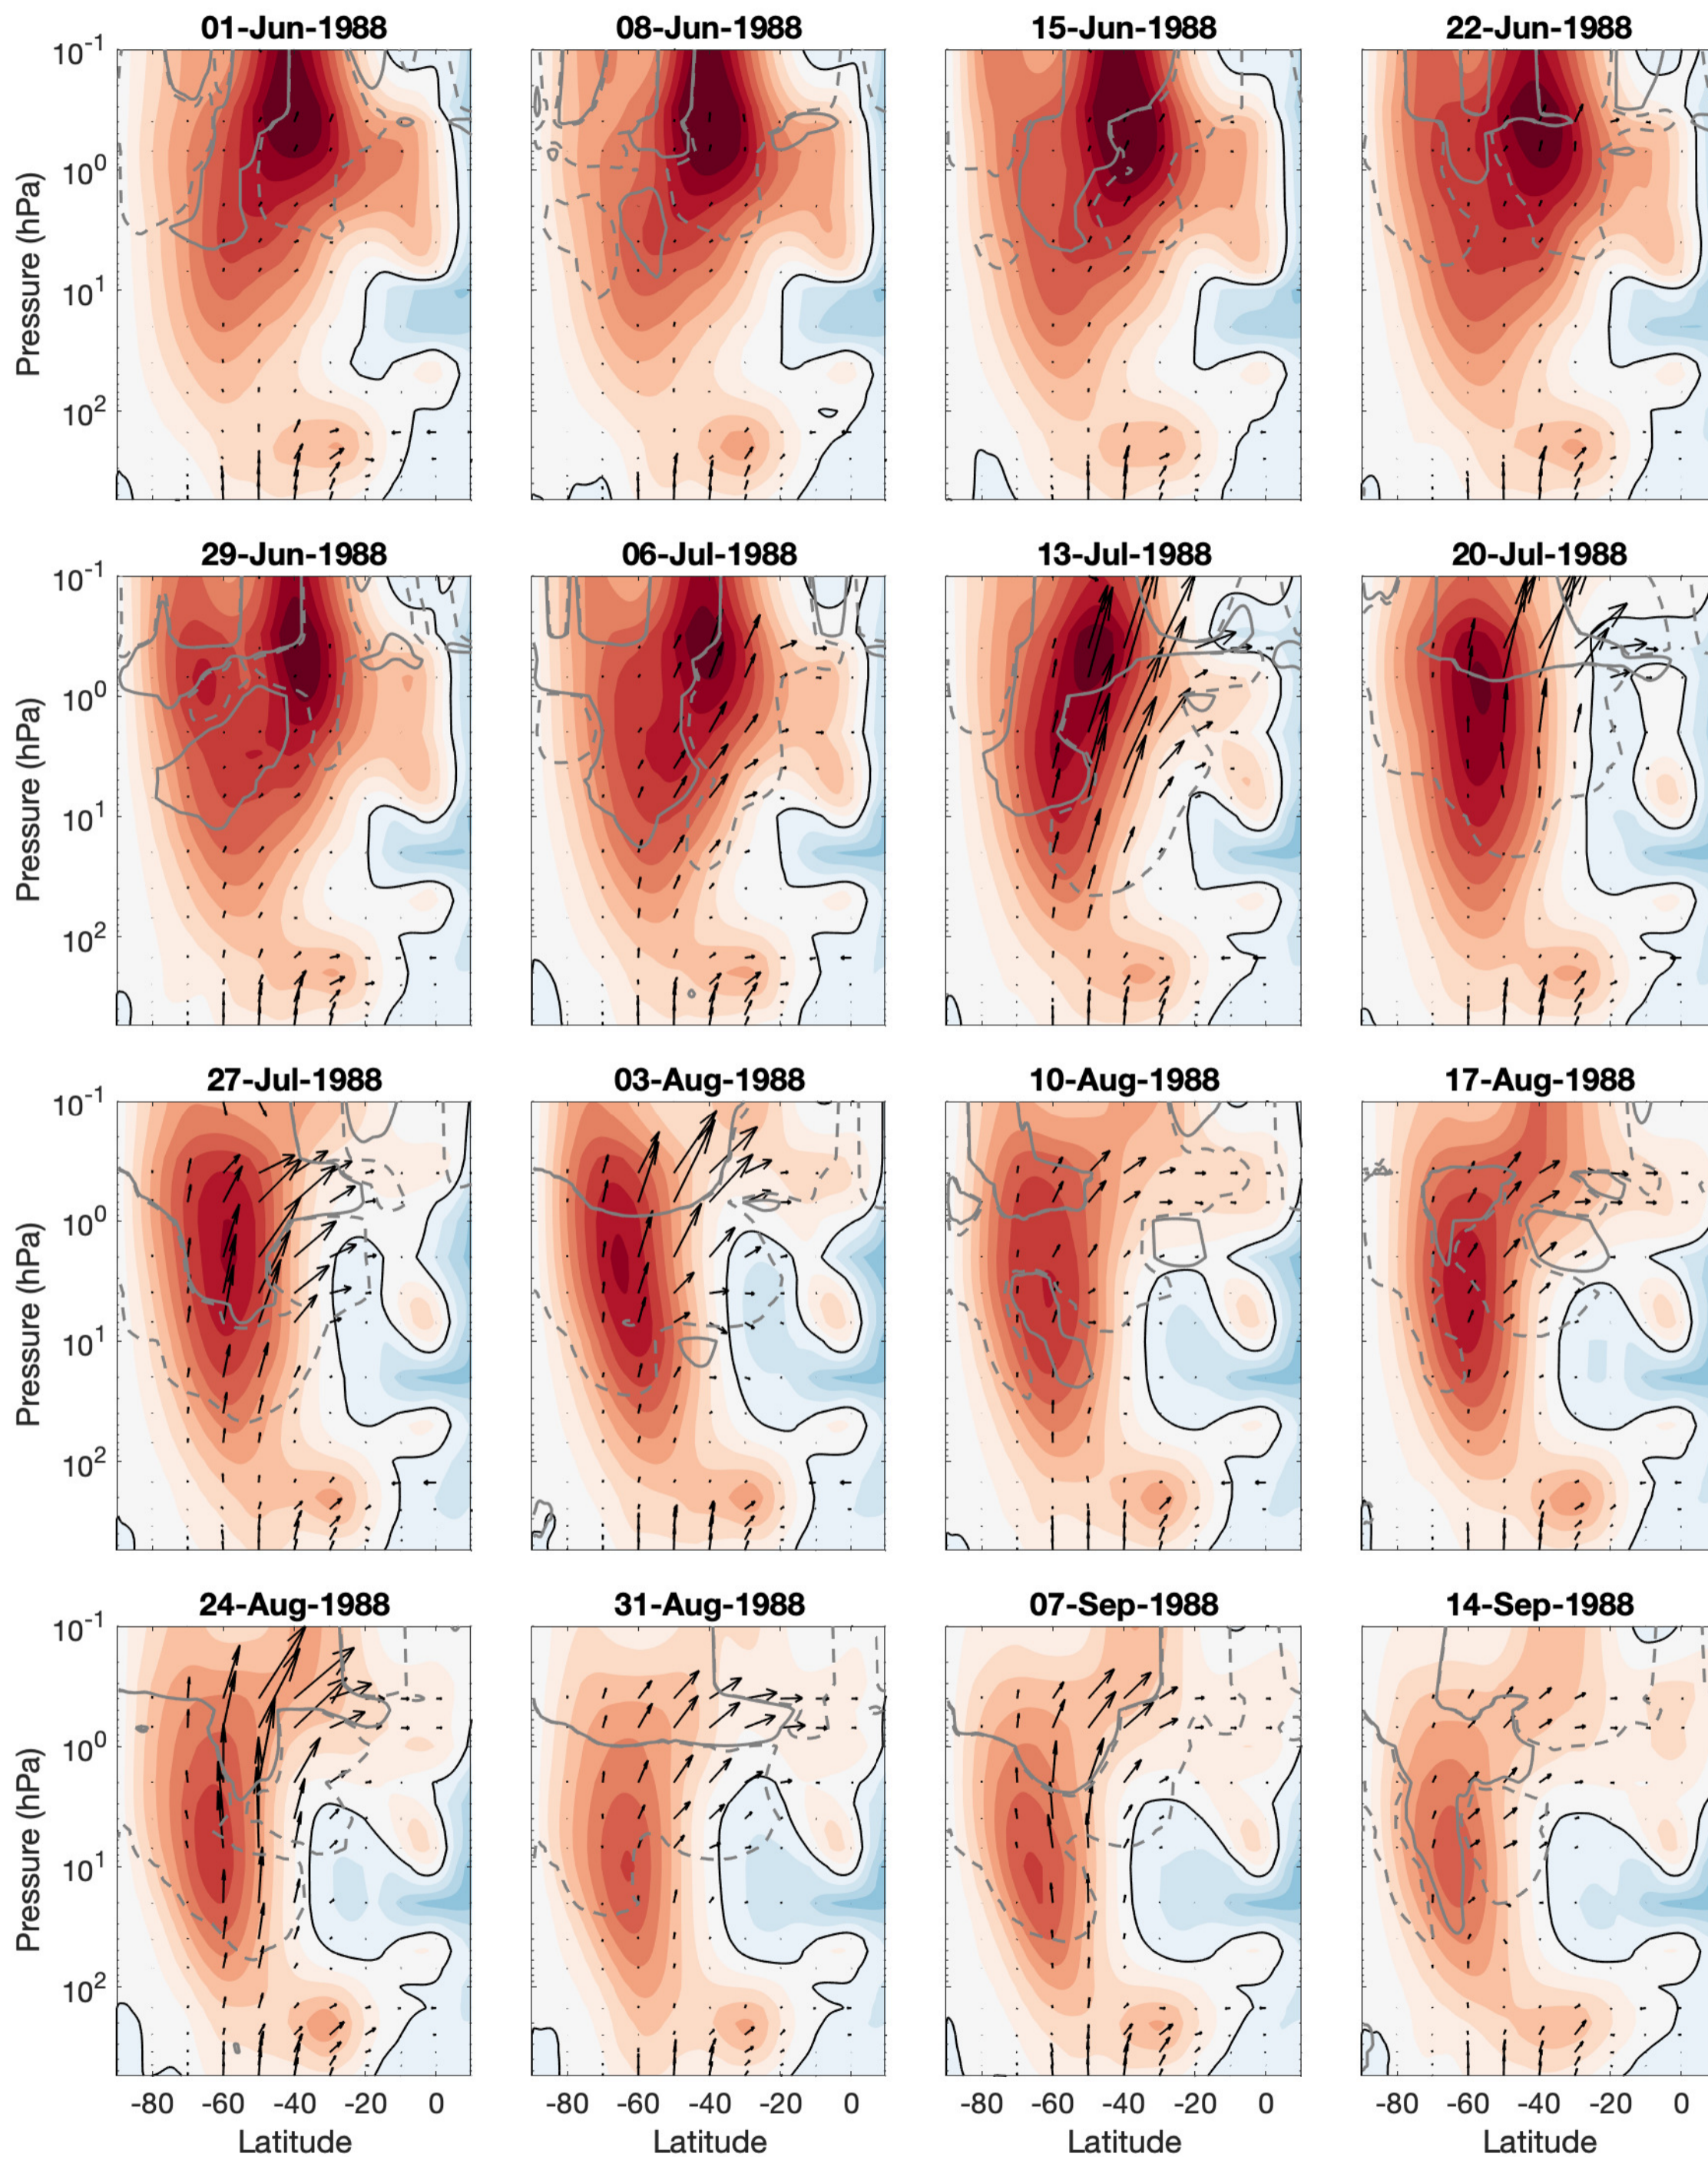

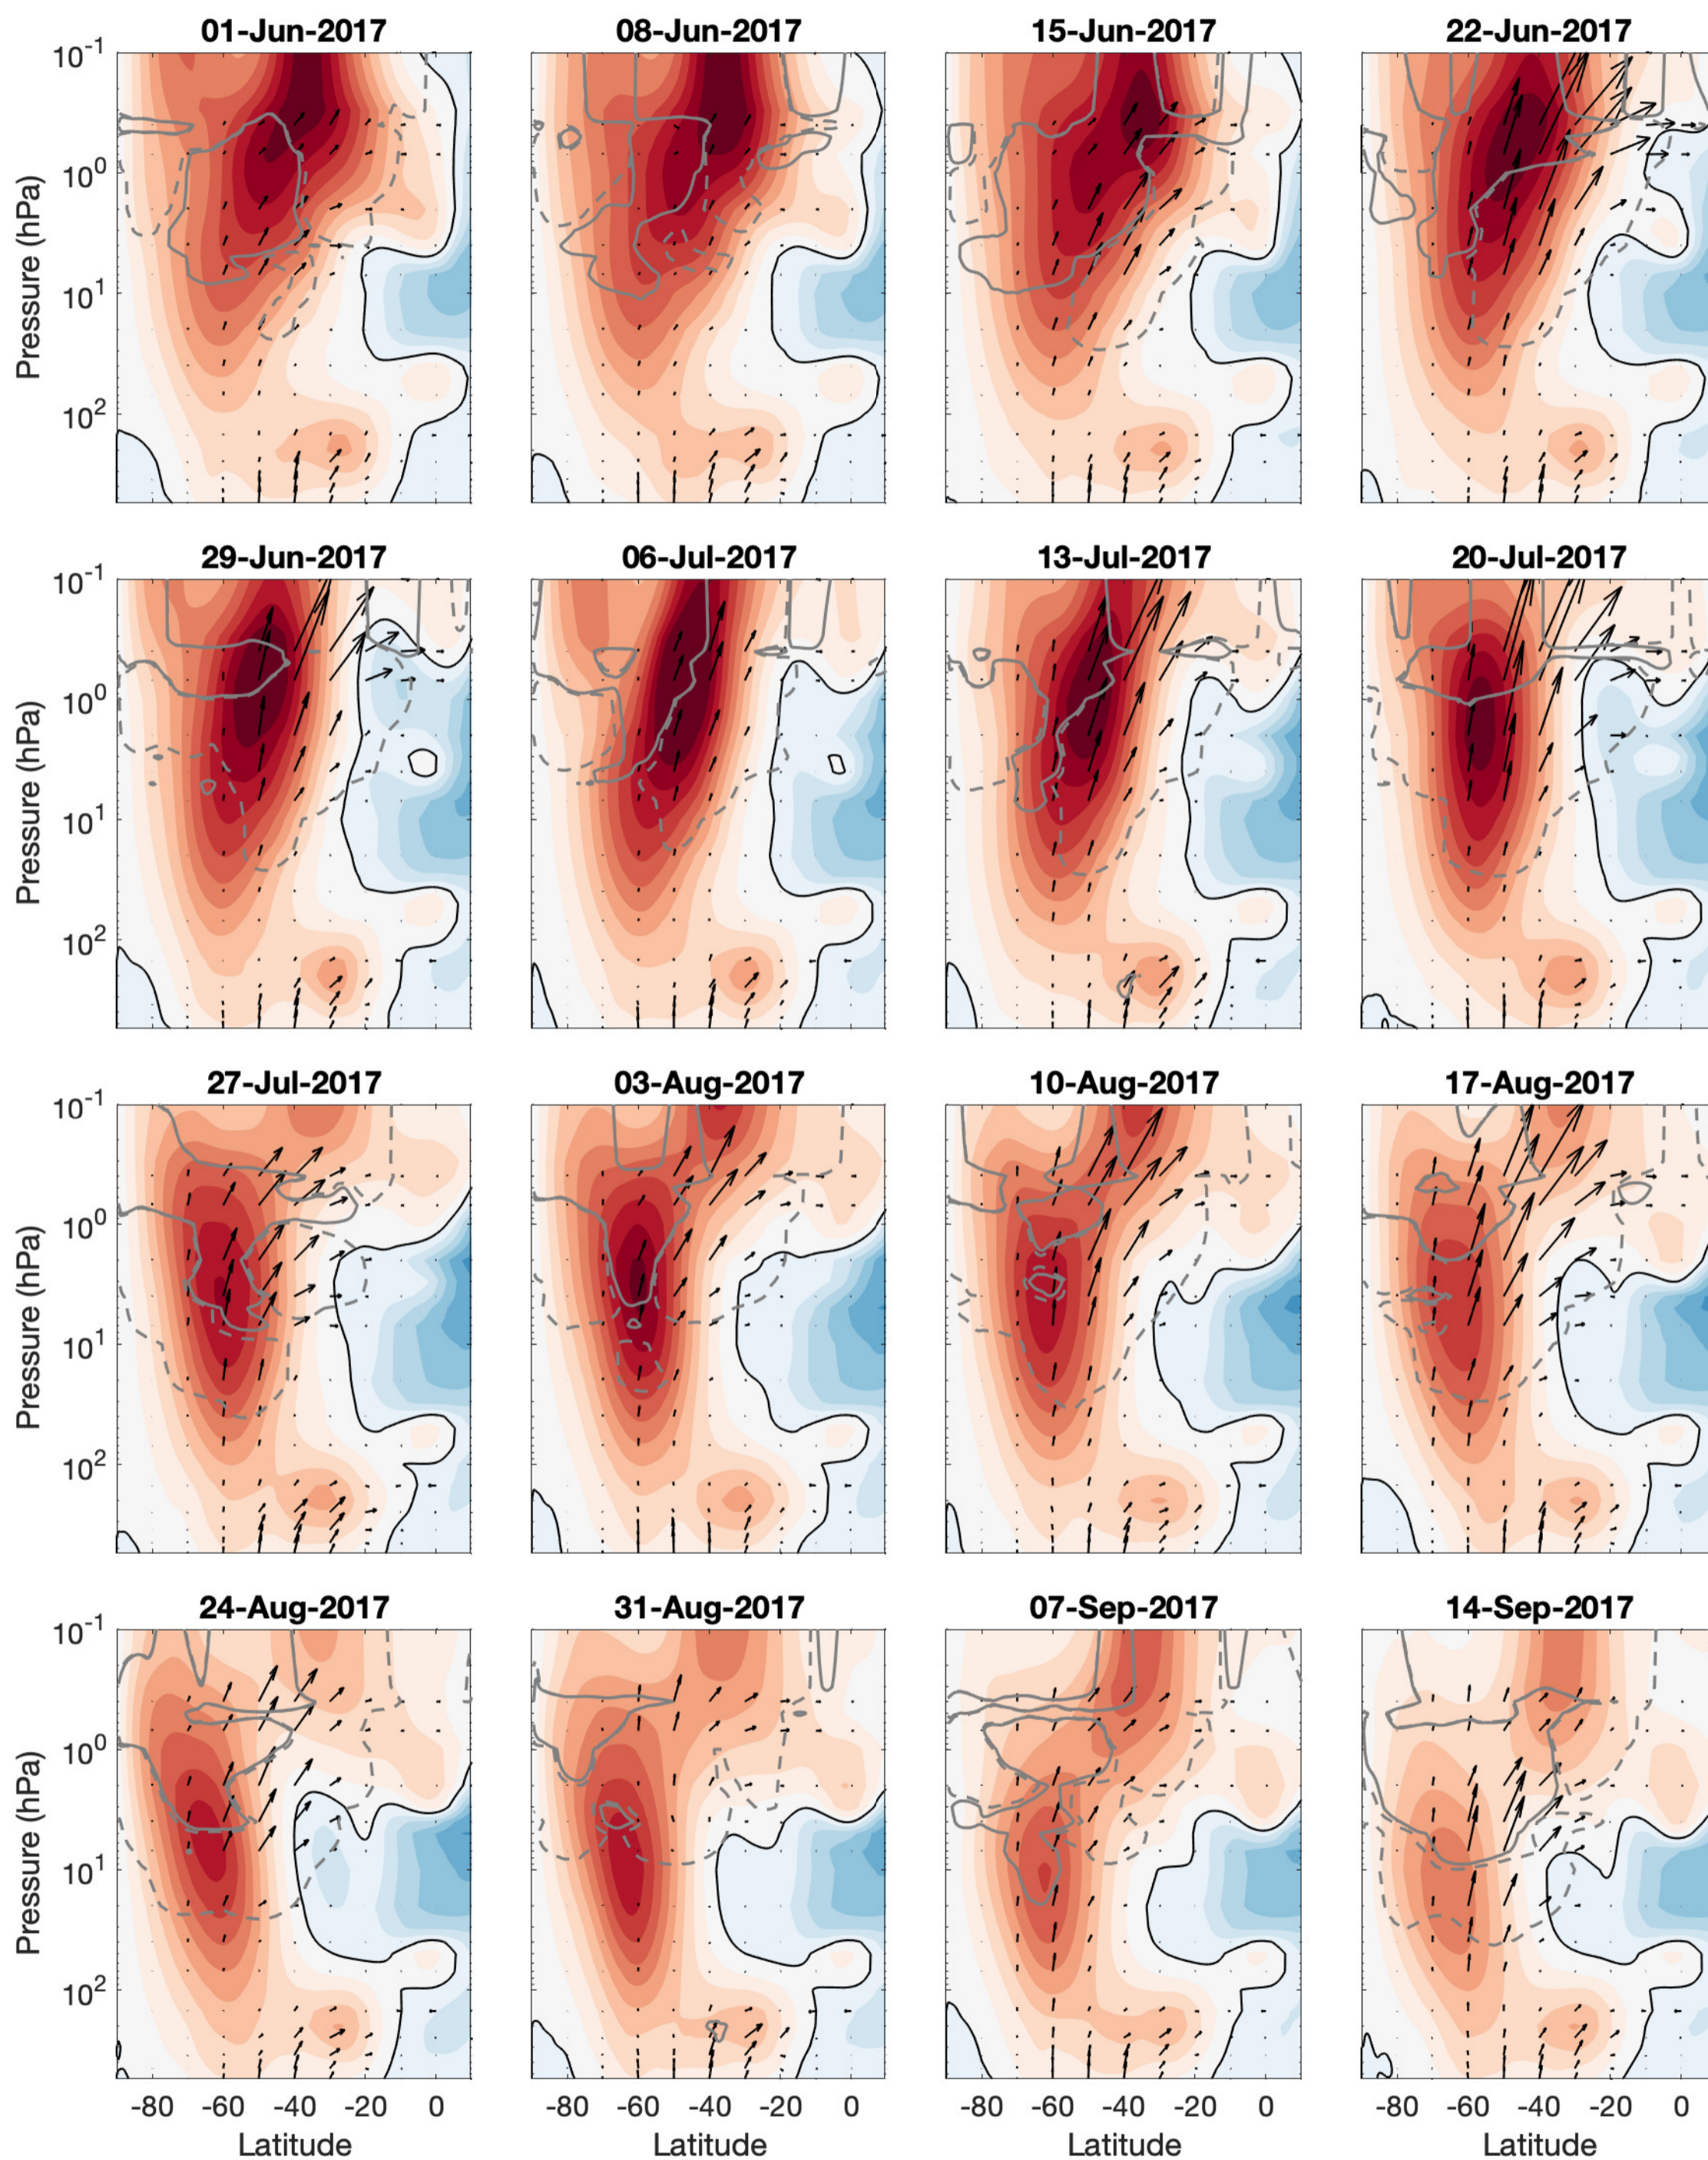

Supplement: Supplementary file 1 [file acp-21-12835-2021-supplement.pdf]
